# Supplementary material
Source: PubMed Central journal article supplement (PMC7232651)
Supplement: Supp_AppS1.pdf [file Supp_AppS1.pdf]

## Supplementary Data

SUPPLEMENTARY APPENDIX A. SUMMARY OF PATIENT DEMOGRAPHICS BASED ON ALIVE/DEAD OR FAVORABLE/UNFAVORABLE  
OUTCOME GROUPS: MANN-WHITNEY U AND CHI-SQUARE TESTING

| Variable                       | Mean/median value ( $\pm$ SD or IQR) |             |                    | Mean/median value ( $\pm$ SD or IQR) |               |                    |
|--------------------------------|--------------------------------------|-------------|--------------------|--------------------------------------|---------------|--------------------|
|                                | Alive                                | Dead        | p value            | Favorable                            | Unfavorable   | p value            |
| No. of patients                | 153                                  | 40          |                    | 83                                   | 110           |                    |
| Age (years)                    | 45.3 (18.4)                          | 59.5 (18.8) | <b>&lt;0.0001</b>  | 42.6 (17.1)                          | 52.5 (19.8)   | <b>0.001</b>       |
| Sex (no. male)                 | 110                                  | 26          | 0.190              | 60                                   | 76            | 0.609              |
| Admission GCS (total)          | 7 (3–10)                             | 6 (3–10)    | 0.154              | 7 (5–12)                             | 5 (3–9)       | <b>0.002</b>       |
| Admission GCS motor            | 4 (1–5)                              | 3 (1–4)     | 0.031 <sup>a</sup> | 5 (3–5)                              | 2 (1–5)       | <b>&lt;0.0001</b>  |
| Admission pupil status         | NS                                   | NS          | 0.121              | NS                                   | NS            | 0.067              |
| Hypoxia                        | 18                                   | 9           | 0.095              | 12                                   | 15            | 0.878              |
| Hypotension                    | 15                                   | 6           | 0.383              | 8                                    | 13            | 0.621              |
| Marshall CT grade              | 3 (2–6)                              | 6 (3–6)     | <b>0.002</b>       | 2 (2–6)                              | 6 (2–6)       | <b>0.002</b>       |
| tSAH                           | 116                                  | 29          | 0.362              | 58                                   | 87            | 0.065              |
| Epidural hematoma              | 32                                   | 5           | 0.194              | 19                                   | 18            | 0.254              |
| Length of recording (h)        | 152.0 (117.6)                        | 102 (60.1)  | <b>0.005</b>       | 137.6 (119.5)                        | 144.6 (102.6) | 0.220              |
| Mean ICP (mm Hg)               | 13.9 (10.6)                          | 24.9 (21.1) | <b>&lt;0.0001</b>  | 14.4 (12.2)                          | 17.5 (15.3)   | 0.114              |
| Mean CPP (mm Hg)               | 70.6 (12.6)                          | 61.0 (21.1) | 0.010 <sup>a</sup> | 70.9 (14.1)                          | 66.9 (15.8)   | 0.039 <sup>a</sup> |
| Mean % time with ICP >20 mm Hg | 13.4 (23.5)                          | 39.2 (38.5) | <b>0.002</b>       | 14.0 (24.5)                          | 22.3 (31.9)   | 0.329              |
| Mean % time with ICP >22 mm Hg | 9.8 (21.1)                           | 34.0 (35.1) | <b>0.001</b>       | 10.4 (22.4)                          | 18.1 (30.1)   | 0.288              |
| Mean % time with PRx >0        | 49.6 (18.0)                          | 68.3 (22.7) | <b>&lt;0.0001</b>  | 49.0 (17.9)                          | 56.9 (21.7)   | 0.013 <sup>a</sup> |
| Mean % time with PRx >+0.25    | 28.6 (15.4)                          | 28.5 (51.4) | <b>&lt;0.0001</b>  | 28.4 (15.9)                          | 37.1 (23.5)   | 0.012 <sup>a</sup> |
| Mean % time with PRx >+0.35    | 21.7 (13.5)                          | 44.9 (29.7) | <b>&lt;0.0001</b>  | 21.7 (14.2)                          | 30.2 (23.3)   | 0.019 <sup>a</sup> |

Note: All bolded *p* values are those <0.05 when comparing the variables between alive/dead and favorable/unfavorable outcome groups. Favorable=Glasgow Outcome Scale of 5–8; unfavorable=Glasgow Outcome Scale of 1–4; NS=no statistically significant difference for number of patients with bilaterally reactive, unilateral reactive, or bilaterally unreactive pupils between both alive/dead and favorable/unfavorable groups.

<sup>a</sup>Failed to reach threshold for statistical significance when correcting for multiple comparisons. Bolded values are those maintaining significance when accounting for multiple comparisons.

AMP, pulse amplitude of ICP; CPP, cerebral perfusion pressure; ICP, intracranial pressure; IQR, interquartile range; MAP, mean arterial pressure; mm Hg, millimeters of mercury; PRx, pressure reactivity index (correlation between ICP and MAP); SD, standard deviation; tSAH, traumatic subarachnoid hemorrhage.
