# Supplementary material
Source: PubMed Central journal article supplement (PMC7232651)
Supplement: Supp_AppS3.pdf [file Supp_AppS3.pdf]

SUPPLEMENTARY APPENDIX C. MULTI-VARIABLE LOGISTIC REGRESSION ANALYSIS: IMPACT CORE + CT MODEL PLUS  
CEREBROVASCULAR REACTIVITY INDICES

| <i>Model</i>                                         | <i>AUC A/D (95% CI)</i> | <i>AIC</i> | <i>p value</i>    | <i>AUC F/U (95% CI)</i> | <i>AIC</i> | <i>p value</i> |
|------------------------------------------------------|-------------------------|------------|-------------------|-------------------------|------------|----------------|
| CORE + CT                                            | 0.673 (0.567–0.773)     | 157.9      | <b>0.015</b>      | 0.652 (0.570–0.732)     | 199.6      | <b>0.001</b>   |
| CORE + CT + mean ICP                                 | 0.774 (0.689–0.857)     | 138.0      | <b>&lt;0.0001</b> | 0.666 (0.587–0.746)     | 199.7      | <b>0.001</b>   |
| CORE + CT + % time ICP >20 mm Hg                     | 0.821 (0.736–0.896)     | 137.5      | <b>&lt;0.0001</b> | 0.661 (0.580–0.742)     | 198.3      | <b>0.001</b>   |
| CORE + CT + % time ICP >22 mm Hg                     | 0.818 (0.729–0.897)     | 138.3      | <b>0.007</b>      | 0.664 (0.584–0.742)     | 198.5      | <b>0.001</b>   |
| % time above PRx thresholds                          |                         |            |                   |                         |            |                |
| CORE + CT + % time PRx >0                            | 0.754 (0.659–0.842)     | 148.3      | <b>0.001</b>      | 0.654 (0.568–0.737)     | 200.8      | <b>0.004</b>   |
| CORE + CT + % time PRx >+0.25                        | 0.784 (0.691–0.872)     | 142.8      | <b>0.001</b>      | 0.666 (0.584–0.746)     | 199.6      | <b>0.004</b>   |
| CORE + CT + % time PRx >+0.35                        | 0.793 (0.701–0.875)     | 140.7      | <b>0.001</b>      | 0.673 (0.585–0.754)     | 199.1      | <b>0.004</b>   |
| Mean ICP + % time above PRx thresholds               |                         |            |                   |                         |            |                |
| CORE + CT + mean ICP + % time PRx >0                 | 0.792 (0.699–0.876)     | 137.6      | <b>0.003</b>      | 0.660 (0.580–0.740)     | 201.5      | <b>0.003</b>   |
| CORE + CT + mean ICP + % time PRx >+0.25             | 0.810 (0.720–0.889)     | 135.8      | <b>0.004</b>      | 0.666 (0.579–0.749)     | 200.9      | <b>0.003</b>   |
| CORE + CT + mean ICP + % time PRx >+0.35             | 0.815 (0.720–0.895)     | 135.1      | <b>0.005</b>      | 0.669 (0.590–0.751)     | 200.6      | <b>0.003</b>   |
| % time ICP >20 mm Hg + % time above PRx thresholds   |                         |            |                   |                         |            |                |
| CORE + CT + % time ICP >20 mm Hg + % time PRx >0     | 0.807 (0.720–0.890)     | 136.6      | <b>0.002</b>      | 0.650 (0.567–0.733)     | 200.2      | <b>0.001</b>   |
| CORE + CT + % time ICP >20 mm Hg + % time PRx >+0.25 | 0.813 (0.728–0.893)     | 134.9      | <b>0.002</b>      | 0.654 (0.570–0.739)     | 199.8      | <b>0.003</b>   |
| CORE + CT + % time ICP >20 mm Hg + % time PRx >+0.35 | 0.819 (0.730–0.902)     | 134.2      | <b>0.004</b>      | 0.656 (0.574–0.741)     | 199.6      | <b>0.003</b>   |
| % time ICP >22 mm Hg + % time above PRx thresholds   |                         |            |                   |                         |            |                |
| CORE + CT + % time ICP >22 mm Hg + % time PRx >0     | 0.801 (0.705–0.887)     | 138.1      | <b>0.001</b>      | 0.652 (0.564–0.732)     | 200.4      | <b>0.002</b>   |
| CORE + CT + % time ICP >22 mm Hg + % time PRx >+0.25 | 0.808 (0.713–0.888)     | 136.4      | <b>0.005</b>      | 0.652 (0.568–0.732)     | 200.0      | <b>0.003</b>   |
| CORE + CT + % time ICP >22 mm Hg + % time PRx >+0.35 | 0.813 (0.720–0.894)     | 135.7      | <b>0.003</b>      | 0.654 (0.570–0.735)     | 199.8      | <b>0.003</b>   |

CORE model consisted of age, admission Glasgow Coma Scale motor score, and pupil response (normal bilaterally, unilateral unreactive, or bilaterally unreactive). Bolded values are those maintaining significance when accounting for multiple comparisons.

A/D, alive/dead; AMP, pulse amplitude of ICP; AUC, area under the receiver operating curve; CPP, cerebral perfusion pressure; CI, confidence interval; F/U, favorable/unfavorable outcome (i.e., favorable=Glasgow Outcome Scale of 5–8; unfavorable=Glasgow Outcome Scale of 1–4); ICP, intracranial pressure; IMPACT, International Mission for Prognosis and Analysis of Clinical Trials; MAP, mean arterial pressure; PRx, pressure reactivity index (correlation between ICP and MAP).
